# Supplementary material for: Neuromuscular Response during Different Side-Cutting Maneuvers and Its Influence on the Risk of Knee Injuries
Source: MDPI journal article supplement (doi:10.3390/sports11100190), 2023-10-03
Supplement: s1 [file s1]

**Supplement A**

Description of each training program’s exercise

| <i>Week</i> | <i>Minutes</i> | <i>Sport Actions</i>                            | <i>Sports Equipment</i>         | <i>Total Exercises</i> | <i>Series-rest</i> | <i>Rep</i> | <i>Observations</i>      |
|-------------|----------------|-------------------------------------------------|---------------------------------|------------------------|--------------------|------------|--------------------------|
| 1           | 40´            | Whole Body Vibration Exercise (30Hz-4mm)        | Vibratory platform              | 5                      | 1-1´               | 10         |                          |
|             |                | Proprioceptive Training                         | Balance platform                | 5                      | 1-1´               | 10         |                          |
|             |                | Eccentric Training                              | Russian belt                    | 5                      | 1-1´               | 10         | No load                  |
|             |                | Suspension Training                             | TRX®                            | 4                      | 1-1´               | 10         |                          |
|             |                | Proprioceptive Training + balance               | Fitball                         | 4                      | 1-1´               | 10         |                          |
| 2           | 45´-50´        | Whole Body Vibration Exercise (30Hz-4mm)        | Vibratory platform              | 5                      | 1-1´               | 20         |                          |
|             |                | Proprioceptive Training                         | Balance platform                | 5                      | 1-1´               | 10         | Closed eyes              |
|             |                | Eccentric Training                              | Russian belt + foam ball + disk | 5                      | 1-1´               | 10         | External load (~10% BMI) |
|             |                | Suspension Training                             | TRX®                            | 4                      | 1-1´               | 12         |                          |
|             |                | Proprioceptive Training + balance               | Fitball                         | 4                      | 1-1´               | 10         | Closed eyes              |
| 3           | 45´-50´        | Whole Body Vibration Exercise (30Hz-4mm) + jump | Vibratory platform              | 4                      | 1-1´               | 10         |                          |
|             |                | Proprioceptive Training + jump                  | Balance platform                | 4                      | 1-1´               | 10         |                          |
|             |                | Coordination                                    | Agility ladder                  | 5                      | 1-1´               | 2          |                          |

|   |         |                                                    |                                       |   |      |    |             |
|---|---------|----------------------------------------------------|---------------------------------------|---|------|----|-------------|
| 4 | 45'-50' | Eccentric Training                                 | Theraband                             | 4 | 1-1' | 10 |             |
|   |         | Proprioceptive Training + balance                  | Fitball                               | 3 | 1-1' | 10 |             |
|   |         | Whole Body Vibration Exercise (30Hz-4mm) + jump    | Vibratory platform                    | 4 | 1-1' | 20 |             |
|   |         | Proprioceptive Training + jump                     | Balance platform                      | 4 | 2-1' | 10 |             |
|   |         | Coordination                                       | Agility ladder                        | 5 | 1-1' | 4  |             |
|   |         | Eccentric Training                                 | Theraband                             | 4 | 1-1' | 16 |             |
|   |         | Proprioceptive Training + balance                  | Fitball                               | 3 | 1-1' | 16 |             |
|   |         | Whole Body Vibration Exercise (30Hz-4mm) + jump    | Vibratory platform                    | 3 | 1-1' | 20 | Closed eyes |
|   |         | Proprioceptive Training + jump                     | Balance platform                      | 4 | 1-1' | 10 | With turns  |
|   |         | Coordination Exercise                              | Agility ladder                        | 5 | 1-1' | 6  |             |
| 5 | 50'-55' | Eccentric Training + balance                       | Theraband + foam ball                 | 4 | 1-1' | 10 | Closed eyes |
|   |         | Proprioceptive Training + balance                  | Fitball                               | 3 | 1-1' | 10 | Closed eyes |
|   |         | Whole Body Vibration Exercise (30Hz-4mm) + balance | Vibratory platform + balance platform | 4 | 1-1' | 10 |             |
|   |         |                                                    |                                       |   |      |    |             |
|   |         |                                                    |                                       |   |      |    |             |
| 6 | 50'-55' |                                                    |                                       |   |      |    |             |
|   |         |                                                    |                                       |   |      |    |             |

|   |         |                                                    |                                              |   |      |    |                          |
|---|---------|----------------------------------------------------|----------------------------------------------|---|------|----|--------------------------|
| 7 | 50'-55' | Proprioceptive Training + cross jumping            | Balance platform                             | 3 | 1-1' | 10 |                          |
|   |         | Isometric + balance                                | Russian belt + balance platform              | 2 | 1-1' | 10 |                          |
|   |         | Suspension Training + balance                      | TRX® + balance platform                      | 3 | 1-1' | 10 |                          |
|   |         | Proprioceptive Training + balance                  | Fitball, balance platform + foam ball        | 2 | 1-1' | 10 |                          |
|   |         | Coordination + balance                             | Agility ladder + balance platform            | 3 | 1-1' | 2  |                          |
|   | 50'-55' | Whole Body Vibration Exercise (30Hz-4mm) + balance | Vibratory platform + balance platform        | 4 | 1-1' | 16 |                          |
|   |         | Proprioceptive Training + cross jumping            | Balance platform                             | 4 | 1-1' | 8  | Closed eyes              |
|   |         | Isometric + balance                                | Russian belt + balance platform              | 2 | 1-1' | 10 | External load (~10% BMI) |
|   |         | Suspension training + balance                      | TRX® + balance platform                      | 3 | 1-1' | 16 |                          |
|   |         | Proprioceptive Training + balance                  | Fitball + balance platform + foam ball       | 2 | 1-1' | 10 | With foot change         |
| 8 | 50'-55' | Coordination + balance                             | Agility ladder + balance platform            | 3 | 1-1' | 4  |                          |
|   |         | Proprioceptive Training + balance + jump           | Agility Ladder + foam ball + balance board   | 4 | 1-1' | 10 | Closed eyes              |
|   |         |                                                    |                                              |   |      |    | Cross jumping            |
|   |         | Proprioceptive Training + balance                  | Cama elástica + balance platform + foam ball | 6 | 1-1' | 10 |                          |

|    |         |                                                  |                                                   |   |      |    |                               |
|----|---------|--------------------------------------------------|---------------------------------------------------|---|------|----|-------------------------------|
| 9  | 55'-60' | Balance                                          | Fitball + balance platform + foam ball            | 2 | 1-1' | 10 |                               |
|    |         | Proprioceptive Training + coordination           | Agility ladder + balance platform                 | 3 | 1-1' | 8  |                               |
|    |         | Proprioceptive Training + balance                | Balance platform + balance board + foam ball      | 3 | 1-1' | 10 | Closed eyes                   |
|    |         | Proprioceptive Training + balance + jump         | Cama elástica + balance platform + foam ball      | 5 | 1-1' | 10 |                               |
|    |         | Balance                                          | Balance board + foam ball                         | 2 | 1-1' | 10 | Closed eyes                   |
|    |         | Proprioceptive Training                          | Fitball + foam ball                               | 1 | 1-1' | 10 | Closed eyes and cross support |
| 10 | 55'-60' | Coordination + Proprioceptive Training + balance | Agility Ladder + balance platform + cama elástica | 4 | 1-1' | 2  |                               |
|    |         | Proprioceptive Training + balance + turns        | Balance platform + balance board                  | 3 | 1-1' | 10 | Upside-down balance platform  |
|    |         | Proprioceptive Training + balance + jump         | Cama elástica + balance platform + foam ball      | 5 | 1-1' | 10 | Closed eyes                   |
|    |         | Balance                                          | Balance board + foam ball                         | 1 | 1-1' | 10 | Closed eyes                   |
|    |         | Proprioceptive Training                          | Fitball + foam ball                               | 1 | 1-1' | 10 | Closed eyes and cross support |
|    |         | Coordination + Proprioceptive Training + balance | Agility ladder + balance platform y cama elástica | 3 | 1-1' | 4  |                               |

|    |         |                                                         |                                                   |   |      |    |                 |
|----|---------|---------------------------------------------------------|---------------------------------------------------|---|------|----|-----------------|
| 11 | 55'-60' | Eccentric Training + Proprioceptive Training            | Theraband + cama elástica                         | 2 | 1-1' | 10 |                 |
|    |         | Proprioceptive Training + balance + turns               | Balance platform + balance board                  | 3 | 1-1' | 16 |                 |
|    |         | Proprioceptive Training + balance + jump + turns        | Cama elástica + balance platform + foam ball      | 6 | 2-1' | 10 |                 |
|    |         | Balance                                                 | Balance board + foam ball                         | 2 | 1-1' | 10 |                 |
|    |         | Proprioceptive Training                                 | Fitball and foam ball                             | 1 | 1-1' | 20 |                 |
|    |         | Coordination + Proprioceptive Training + balance        | Agility ladder + balance platform y cama elástica | 3 | 1-1' | 6  |                 |
| 12 | 55'-60' | Eccentric Training + Proprioceptive Training            | Theraband + cama elástica + foam ball             | 2 | 1-1' | 20 |                 |
|    |         | Proprioceptive Training + balance + turns               | Balance platform + balance board                  | 4 | 1-1' | 16 | With stop tasks |
|    |         | Proprioceptive Training + balance + jump + turns        | Cama elástica, balance platform + foam ball       | 6 | 1-1' | 16 |                 |
|    |         | Balance                                                 | Balance board + foam ball                         | 2 | 1-1' | 20 |                 |
|    |         | Coordination + Proprioceptive Training + balance + jump | Agility ladder + balance platform y cama elástica | 3 | 1-1' | 6  |                 |
|    |         | Eccentric Training + Proprioceptive Training            | Theraband + cama elástica + foam ball             | 2 | 1-1' | 16 |                 |
